# Supplementary material for: Real-World Effectiveness of Palbociclib Versus Clinical Trial Results in Patients With Advanced/Metastatic Breast Cancer That Progressed on Previous Endocrine Therapy
Source: PubMed Central journal article supplement — Breast Cancer (Auckl). 2019 Jan 10;13:1178223418823238. doi: 10.1177/1178223418823238 (PMC6330732; doi:10.1177/1178223418823238), 2019-01-10
Supplement: Additionalfile1.pdf [file Additionalfile1.pdf]

|                                                                                                  | <b>REAL-WORLD (N=46)</b>                                                                                             | <b>PALOMA-3 (N=345)</b>                                                                                            |
|--------------------------------------------------------------------------------------------------|----------------------------------------------------------------------------------------------------------------------|--------------------------------------------------------------------------------------------------------------------|
| Most common haematological AEs (all grades)                                                      | neutropenia (93%), leukopenia (89%), thrombocytopenia (48%), anaemia (46%)                                           | neutropenia (81%), leukopenia (50%), thrombocytopenia (21%), anaemia (28%)                                         |
| Most common non-haematological AEs (all grades)                                                  | fatigue (59%), decreased appetite (37%), infections (35%), nausea (35%), increased ASAT (28%), dizziness (26%)       | infections (41%), fatigue (39%), nausea (32%), headache (23%), diarrhoea (21%), constipation (19%), alopecia (17%) |
| Grade 3-4 haematological AEs                                                                     | neutropenia (63%), leukopenia (33%)                                                                                  | neutropenia (65%), leukopenia (28%)                                                                                |
| Grade 3-4 non-haematological AEs (>2.5%)                                                         | pneumonia (n=3, 7%), pleural effusion (n=3, 7%), hypertension (n=2, 4%), ascites (n=2, 4%), increased ASAT (n=2, 4%) | no non-haematological AEs >2.5%                                                                                    |
| Serious AEs (all causalities)                                                                    | occurred in 13% of patients (n=6)                                                                                    | occurred in 13% of patients (n=44)                                                                                 |
| Febrile neutropenia                                                                              | did not occur                                                                                                        | was uncommon (n=3, 0.9%)                                                                                           |
| <i>Note.</i> PALOMA-3 data were adapted from Cristofanilli et al. (2016) and Verma et al. (2016) |                                                                                                                      |                                                                                                                    |
