# Supplementary material for: Real-World Effectiveness of Palbociclib Versus Clinical Trial Results in Patients With Advanced/Metastatic Breast Cancer That Progressed on Previous Endocrine Therapy
Source: PubMed Central journal article supplement — Breast Cancer (Auckl). 2019 Jan 10;13:1178223418823238. doi: 10.1177/1178223418823238 (PMC6330732; doi:10.1177/1178223418823238), 2019-01-10
Supplement: Additionalfile2.pdf [file Additionalfile2.pdf]

|                     | <b>REAL-WORLD (N=46)</b> | <b>PALOMA-3 (N=345)</b> |
|---------------------|--------------------------|-------------------------|
|                     | <b>n (%)</b>             | <b>n (%)</b>            |
| Lymphopenia         | 8 (17%)                  | 6 (2%)                  |
| Thrombocytopenia    | 22 (48%)                 | 73 (21%)                |
| Decreased appetite  | 17 (37%)                 | 52 (15%)                |
| Dizziness           | 12 (26%)                 | 41 (12%)                |
| Increased ASAT      | 13 (28%)                 | 24 (7%)                 |
| Increased ALAT      | 6 (13%)                  | 19 (6%)                 |
| Injection-site pain | 7 (15%)                  | 22 (6%)                 |
| Bone pain           | 6 (13%)                  | 17 (5%)                 |
| (Other) pain        | 9 (20%)                  | 17 (5%)                 |
| Malaise             | 7 (15%)                  | 12 (3%)                 |
| Arthralgia          | 1 (2%)                   | 49 (14%)                |
