# Supplementary material for: Real-World Effectiveness of Palbociclib Versus Clinical Trial Results in Patients With Advanced/Metastatic Breast Cancer That Progressed on Previous Endocrine Therapy
Source: PubMed Central journal article supplement — Breast Cancer (Auckl). 2019 Jan 10;13:1178223418823238. doi: 10.1177/1178223418823238 (PMC6330732; doi:10.1177/1178223418823238), 2019-01-10
Supplement: Additionalfile3.pdf [file Additionalfile3.pdf]

|                                                                                                                                                                                                                                                                                     | <b>REAL-WORLD (N=46)</b> |
|-------------------------------------------------------------------------------------------------------------------------------------------------------------------------------------------------------------------------------------------------------------------------------------|--------------------------|
|                                                                                                                                                                                                                                                                                     | <b>n (%)</b>             |
| Dysgeusia                                                                                                                                                                                                                                                                           | 10 (22%)                 |
| Psychological and behavioural changes                                                                                                                                                                                                                                               | 10 (22%)                 |
| Flu-like symptoms                                                                                                                                                                                                                                                                   | 8 (17%)                  |
| Muscle stiffness                                                                                                                                                                                                                                                                    | 8 (17%)                  |
| Numbness and tingling                                                                                                                                                                                                                                                               | 8 (17%)                  |
| Altered defecation (other than diarrhoea and constipation)                                                                                                                                                                                                                          | 8 (17%)                  |
| Watering eyes                                                                                                                                                                                                                                                                       | 7 (15%)                  |
| Difficulty or pain when walking                                                                                                                                                                                                                                                     | 7 (15%)                  |
| Cramps in lower limbs                                                                                                                                                                                                                                                               | 6 (13%)                  |
| <p>Adverse events were graded in accordance with the maximum Common Terminology Criteria for Adverse Events (version 4.0) as far as possible. Additional terms were introduced to describe adverse events which did not fit any of the existing terms in PALOMA-3 and/or CTCAE.</p> |                          |
